# Supplementary material for: Tenofovir disoproxil fumarate in pregnancy for prevention of mother to child transmission of hepatitis B in a rural setting on the Thailand-Myanmar border: a cost-effectiveness analysis
Source: PubMed Central journal article supplement (PMC7901182; doi:10.1186/s12884-021-03612-z), 2021-02-22

Strategy 2

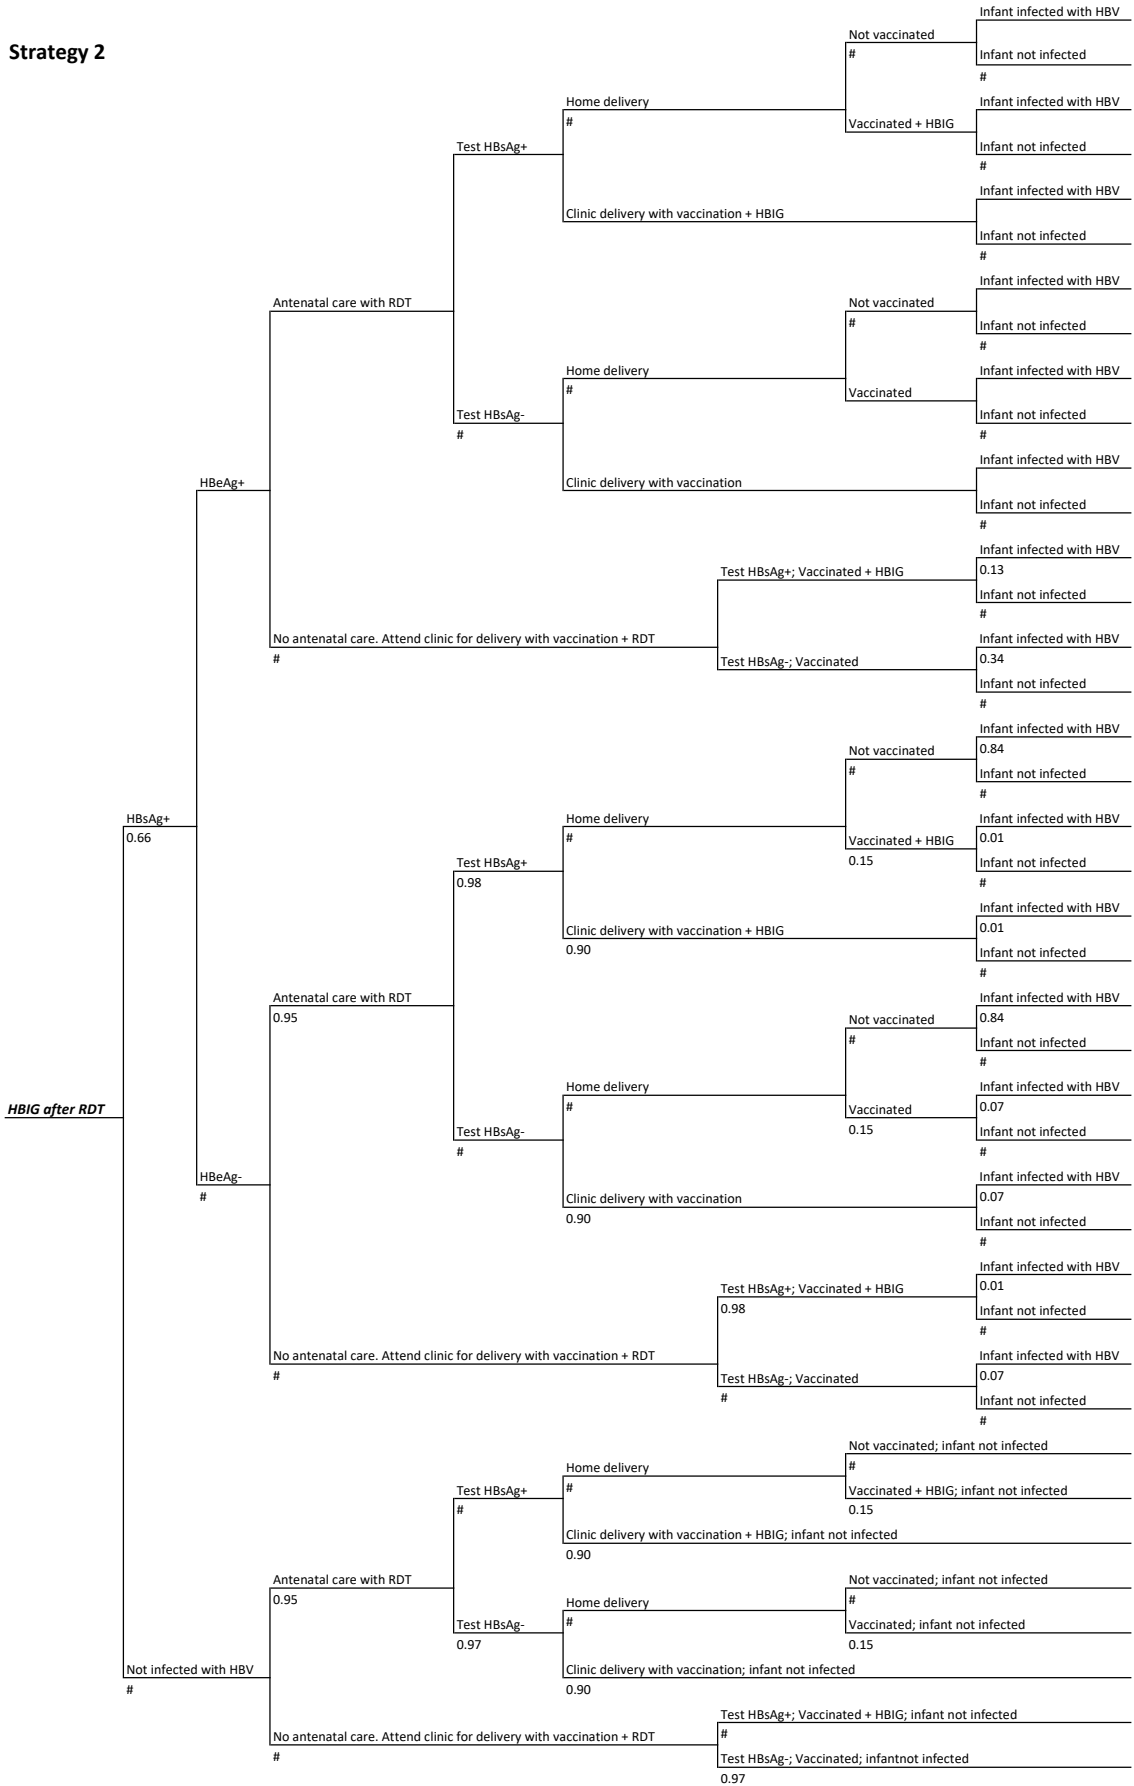

Supplement: 12884_2021_3612_MOESM2_ESM.pdf [file 12884_2021_3612_MOESM2_ESM.pdf]
